# Supplementary material for: An electrical solid-state sulphur dioxide vapour sensor based on a polyvinyl alcohol formaldehyde composite
Source: Royal Society of Chemistry journal article supplement (doi:10.1039/c7tc00442g), 2017-01-01
Supplement: c7tc00442g1.pdf [file c7tc00442g1.pdf]

## Electronic Supplementary Information

### **. An Electrical Solid State Sulphur dioxide Vapour Sensor based on Polyvinyl alcohol Formaldehyde Composite**

Sudesna Chakravarty<sup>1</sup>, Arpan Datta<sup>2</sup> and Neelotpal Sen Sarma<sup>1\*</sup>

<sup>1</sup>: *Advanced Materials Laboratory, Physical Sciences Division, Institute of Advanced Study in Science and Technology (IASST), Guwahati, Assam 781035, India*

<sup>2</sup>: *Department of Applied Sciences, Institute of Science and Technology (IST), Guwahati University, Guwahati, Assam 781035, India*

Corresponding author E-mail: [neelot@iasst.gov.in](mailto:neelot@iasst.gov.in)

Tel. No. +91 361 2912073. Fax: +91 361 2279909

#### **1. Synthesis of PVFCNPs, PVFCNTs, PVFTH and PVFCY**

50 g of PVA was dissolved in deionized water by vigorous stirring with a magnetic stirrer at 95 °C until completely dissolved. It was then followed by addition of formaldehyde (10 ml) and PEG-100 (1.5 g) into the hot PVA solution with vigorous stirring. 30 mg/ml solution of CNTs was added to the froth followed by addition of 15 ml conc. H<sub>2</sub>SO<sub>4</sub> at room temperature. The raw material was oven dried for 5 h. The unreacted materials was removed by washing 5 times with deionized water. The sample so obtained was finally dried for 1 h at 60 °C.

Similarly, PVFCNTs was prepared by adding an aqueous solution 0.02 g of CNTs. PVFCY and PVFTH were also prepared by slight modification with the addition of 0.1g aqueous solution of cytochrome c and 1 ml thiophene respectively.

#### **2. Thermogravimetric analysis (TGA)**

TGA of the synthesized composite materials-PVF, PVFCNTs, PVFCNPs, PVFTH, PVFCY and PVFCOU are carried out. The thermograms suggest that the materials are considerably stable and their complete degradation take place at 600 °C.

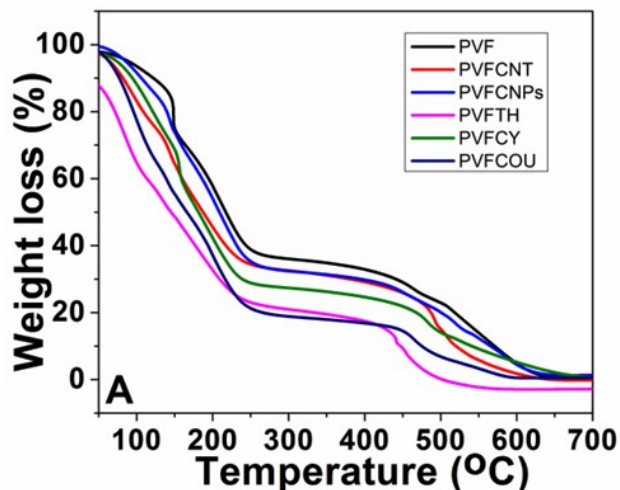

**Fig. S1** TGA of the synthesized materials-PVF, PVFCNTs, PVFCNPs, PVFTH, PVFCY and PVFCOU.

### 3. EDAX analysis of PVFTH/PVFTHSO<sub>2</sub> and PVFCOU/PVFCOUSO<sub>2</sub>

EDAX analysis of PVFTH and PVFCOU are carried out and the EDAX profiles are given below in **Fig. S2**. It is found that S content of SO<sub>2</sub> impregnated PVFTH increases from 4.28 % (PVFTH) to 10.06% (PVFTHSO<sub>2</sub>) whereas from 0% (PVFCOU) to 4.29% (PVFCOUSO<sub>2</sub>).

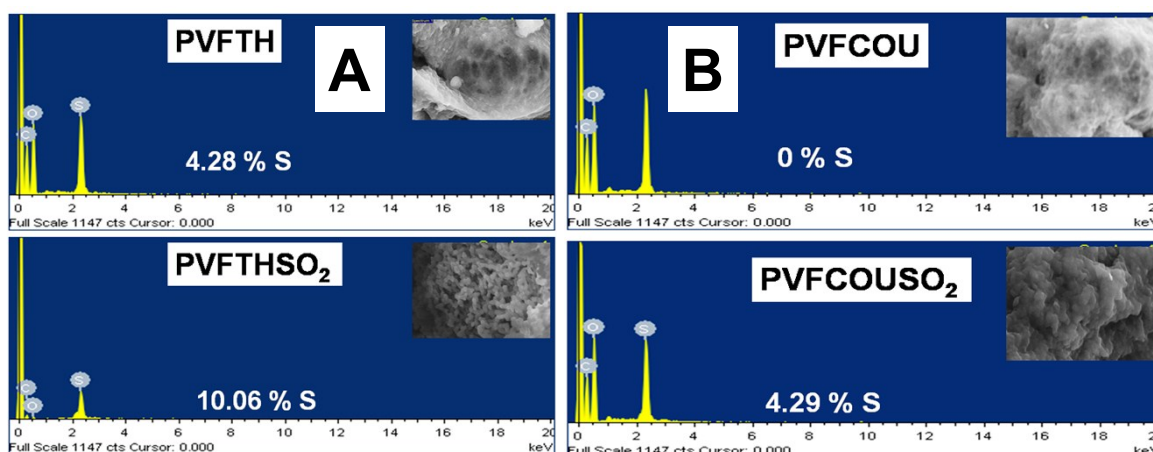

**Fig. S2** EDAX profiles of (A) PVFTH and PVFTHSO<sub>2</sub>; and (B) PVFCOU and PVFCOUSO<sub>2</sub>

#### 4. FT-IR analysis of PVFCNTsSO<sub>2</sub>, PVFCNPsSO<sub>2</sub> and PVFCYSO<sub>2</sub>

The FT-IR analysis of PVFCNPs, PVFCNTs and PVFCOU were carried out before and after SO<sub>2</sub> sensing and the plot is depicted below in **Fig. S3**.

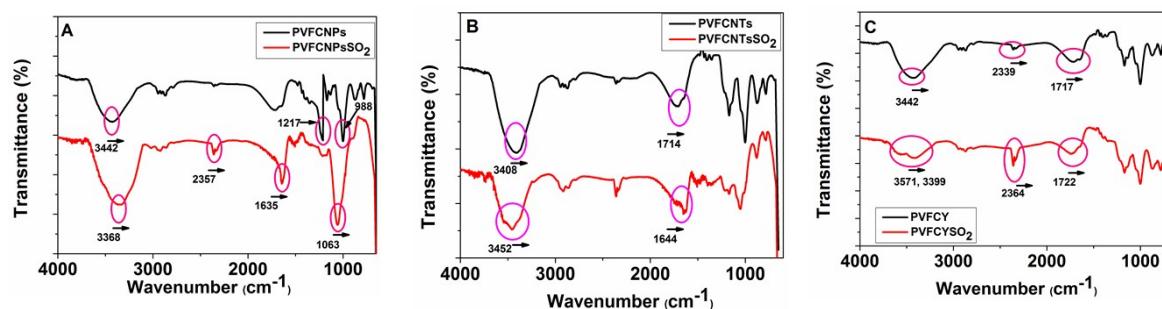

**Fig. S3** FT-IR spectra of (A) PVFCNPs and PVFCNPsSO<sub>2</sub>; (B) PVFCNTs and PVFCNTsSO<sub>2</sub>; and (C) PVFCOU and PVFCOUSO<sub>2</sub>

#### 5. Repeatability and reproducibility studies

Sensing studies are carried out for a consecutive three cycles and it is observed that our sensor exhibit good repeatability and reproducibility (**Fig. S4**). This study indicates that our sensor can be reusable for upto three times.

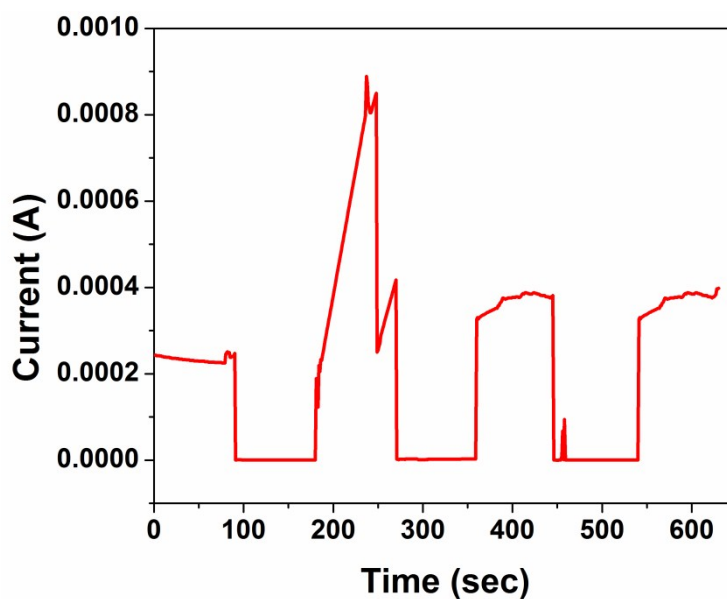

**Fig. S4** Repeatability and reproducibility curves for SO<sub>2</sub> sensing by PVFCOU for a consecutive three cycles
